# Supplementary material for: Increased Transmissibility of SARS-CoV-2 Alpha Variant (B.1.1.7) in Children: Three Large Primary School Outbreaks Revealed by Whole Genome Sequencing in the Netherlands
Source: Research Square preprint supplement (doi:10.21203/rs.3.rs-1107495/v1), 2021-12-08
Supplement: Supplementary file 1 [file 90490358a84141f5f1696d48.xlsx]

## Sheet: Blad1
Supplementary file 1:
An overview of cases, their respective classes, day of symptom onset and genotypes
	School 1
Number	Child/staff member	Class	Date of symptom onset	Genotype	GISAID accension ID
1	Staff member	6A	2021-03-06
2	Staff member	6A&8A	2021-03-07	A	hCoV-19/Netherlands/LIMUMC-1883/2021
3	Staff member	1/2C	2021-03-07	Failed sequence
4	Child	6A	2021-03-07
5	Staff member	1/2C	2021-03-08	A	hCoV-19/Netherlands/LIMUMC-1797/2021
6	Staff member	6A&8A	2021-03-08
7	Staff member	Principal	2021-03-08
8	Child	6A	2021-03-08	Failed sequence
9	Child	6A	2021-03-08	A	hCoV-19/Netherlands/LIMUMC-1880/2021
10	Staff member	4A	2021-03-09	A	hCoV-19/Netherlands/LIMUMC-1798/2021
11	Child	6A	2021-03-09
12	Child	6A	2021-03-09
13	Child	6A	2021-03-09
14	Child	6A	2021-03-09
15	Child	6A	2021-03-10
16	Child	6A	2021-03-10
17	Child	6A	2021-03-10
18	Child	6A	2021-03-11
19	Child	1/2C	2021-03-11	A1	hCoV-19/Netherlands/LIMUMC-1878/2021
20	Child	1/2B	2021-03-11	A	hCoV-19/Netherlands/LIMUMC-1877/2021
21	Child	5A	2021-03-11
22	Staff member	4A	2021-03-12
23	Staff member	8A	2021-03-12	A	hCoV-19/Netherlands/LIMUMC-1799/2021
24	Child	5A	2021-03-12
25	Child	6A	2021-03-12
26	Child	6A	2021-03-12
27	Child	7A	2021-03-12	B	hCoV-19/Netherlands/LIMUMC-1886/2021
28	Child	8A	2021-03-12	A2	hCoV-19/Netherlands/LIMUMC-1882/2021
29	Child	6A	2021-03-13
30	Child	6A	2021-03-14
31	Child	6A	2021-03-14
32	Child	1/2B	2021-03-15	A	hCoV-19/Netherlands/LIMUMC-1874/2021
33	Child	5A	2021-03-15
34	Child	8A	2021-03-15
35	Child	5A	2021-03-16	Failed sequence
36	Child	6A	2021-03-16
37	Child	7A	2021-03-16	A	hCoV-19/Netherlands/LIMUMC-1885/2021
38	Child	5A	2021-03-18
39	Child	4A	2021-03-20
40	Child	5A	2021-03-20	A1	hCoV-19/Netherlands/LIMUMC-1875/2021
41	Child	7A	2021-03-24
		School 2
Number	Classification	Class	Date of symptom onset	Genotype	GISAID accension ID
1	Staff member	8A	2021-03-07	C	hCov-19/Netherlands/LIMUMC-1428/2021
2	Child	8A	2021-03-07
3	Staff member	4A	2021-03-12	C	hCov-19/Netherlands/LIMUMC-1718/2021
4	Child	2/3A	2021-03-12	C	hCov-19/Netherlands/LIMUMC-1719/2021
5	Child	5A	2021-03-12	C1	hCov-19/Netherlands/LIMUMC-1876/2021
6	Child	4A	2021-03-13
7	Child	7A	2021-03-13
8	Staff member	8A	2021-03-14
9	Child	7A	2021-03-15
10	Child	7A	2021-03-15
11	Child	7A	2021-03-15	C	hCov-19/Netherlands/LIMUMC-1575/2021
12	Child	8A	2021-03-15
13	Child	4A	2021-03-16
14	Child	1/2A	2021-03-17
15	Child	1/2A	2021-03-17
16	Child	6A	2021-03-17	C	hCov-19/Netherlands/LIMUMC-1881/2021
17	Staff member	6A	2021-03-17	C	hCov-19/Netherlands/LIMUMC-1800/2021
18	Child	7A	2021-03-17
19	Child	8A	2021-03-17
20	Child	8A	2021-03-17
21	Child	8A	2021-03-17
22	Staff member	1/2A & 4A	2021-03-18
23	Child	2/3A	2021-03-18
24	Child	4A	2021-03-18
25	Child	4A	2021-03-18
26	Child	4A	2021-03-18
27	Child	4A	2021-03-18
28	Child	7A	2021-03-18
29	Child	8A	2021-03-18
30	Staff member	7A	2021-03-19
31	Child	7A	2021-03-19
32	Child	7A	2021-03-20
33	Child	7A	2021-03-20
34	Child	8A	2021-03-20	C	hCov-19/Netherlands/LIMUMC-1884/2021
35	Child	8A	2021-03-20
36	Child	7A	2021-03-22
37	Child	6B	2021-03-24	Failed sequence
38	Child	1A	2021-03-30
39	Staff member	Administrator	Unknown
		School 3
Number	Child/staff member	Class	Date of symptom onset	Genotype	GISAID accension ID
1	Staff member	6B	2021-03-19
2	Child	6A	2021-03-19	Failed sequence
3	Child	7C	2021-03-19	Failed sequence
4	Child	6B	2021-03-21
5	Child	6B	2021-03-22
6	Child	6B	2021-03-22	D	hCoV -19/Netherlands/LI - MUMC -1680/2021
7	Child	6B	2021-03-22
8	Child	6B	2021-03-22
9	Staff member	6B	2021-03-22	D	hCoV -19/Netherlands/LI - MUMC -2694/2021
10	Staff member	6B	2021-03-23	D	hCoV -19/Netherlands/LI - MUMC -2598/2021
11	Child	7B	2021-03-23	D	hCoV -19/Netherlands/LI - MUMC -2658/2021
12	Child	6A	2021-03-24
13	Child	6A	2021-03-24
14	Child	6B	2021-03-24
15	Staff member	6B	2021-03-25
16	Child	8A	2021-03-25
17	Child	6B	2021-03-26
18	Child	7B	2021-03-26
19	Staff member	8A	2021-03-27	D	hCoV -19/Netherlands/LI - MUMC -2597/2021
20	Child	4B	2021-03-27	D	hCoV -19/Netherlands/LI - MUMC -2633/2021
21	Child	6A	2021-03-27	G	hCoV -19/Netherlands/LI - MUMC -2656/2021
22	Child	6B	2021-03-27	Failed sequence
23	Child	6B	2021-03-27
24	Child	6B	2021-03-27
25	Child	8A	2021-03-29	D	hCoV-19/Netherlands/LIMUMC-2663/2021
26	Child	8B	2021-03-30	D	hCoV-19/Netherlands/LIMUMC-2642/2021
27	Child	7B	2021-03-31
28	Child	7B	2021-03-31
29	Child	8A	2021-03-31
30	Child	7B	2021-04-01	Failed sequence
31	Child	8A	2021-04-01
32	Child	6B	2021-04-04	Failed sequence
33	Child	6B	2021-04-04	D	hCoV -19/Netherlands/LI - MUMC -2664/2021
34	Child	6B	2021-04-04
35	Child	2A	2021-04-08	Failed sequence
36	Child	2A	2021-04-14
37	Child	4B	2021-04-16	F	hCoV -19/Netherlands/LI - MUMC -2675/2021
38	Child	4B	2021-04-21
39	Child	1C	2021-04-23	E	hCoV -19/Netherlands/LI - MUMC -2649/2021
40	Child	7C	2021-04-24
41	Child	7C	2021-04-27
